# Supplementary material for: Smoking Cessation Among People Seeking Mental Health Treatment
Source: Atypon-hosted journal article supplement (doi:10.1176/appi.ps.201300444), 2014-07-01
Supplement: 957_ds001.pdf [file 957_ds001.pdf]

## Supplemental Reading

### Sociodemographic Characteristics, Smoking Behaviors, and Smoking Cessation among Current Smokers, National Health Interview Survey 2000, 2005 and 2010 pooled data

|                                                | Current Smokers<br>Who Had Seen a<br>Health Professional<br>for Mental Health<br>in the Past Year<br>(n=1897) ,<br>% | Current Smokers<br>Who Had Not Seen<br>a Health<br>Professional for<br>Mental Health in<br>the Past Year<br>(n=17,042),<br>% | Test of Difference,<br>p-value <sup>a</sup> |
|------------------------------------------------|----------------------------------------------------------------------------------------------------------------------|------------------------------------------------------------------------------------------------------------------------------|---------------------------------------------|
| <b><i>Sociodemographic Characteristics</i></b> |                                                                                                                      |                                                                                                                              |                                             |
| Gender                                         |                                                                                                                      |                                                                                                                              | <.001                                       |
| Male                                           | 44.6                                                                                                                 | 54.8                                                                                                                         |                                             |
| Female                                         | 55.4                                                                                                                 | 45.2                                                                                                                         |                                             |
| Age                                            |                                                                                                                      |                                                                                                                              | <.001                                       |
| 18-34                                          | 38.4                                                                                                                 | 35.4                                                                                                                         |                                             |
| 35-64                                          | 58.7                                                                                                                 | 57.0                                                                                                                         |                                             |
| 65 and older                                   | 2.9                                                                                                                  | 7.6                                                                                                                          |                                             |
| Ethnicity                                      |                                                                                                                      |                                                                                                                              |                                             |
| Non-Hispanic White                             | 79.2                                                                                                                 | 74.5                                                                                                                         | <.001                                       |
| Other                                          | 20.8                                                                                                                 | 25.5                                                                                                                         |                                             |
| Marital status                                 |                                                                                                                      |                                                                                                                              |                                             |
| Married/partnered                              | 45.4                                                                                                                 | 58.5                                                                                                                         | <.001                                       |
| Single/widowed/divorced                        | 54.6                                                                                                                 | 41.4                                                                                                                         |                                             |
| Education                                      |                                                                                                                      |                                                                                                                              | <.001                                       |
| Less than high school                          | 20.4                                                                                                                 | 19.3                                                                                                                         |                                             |
| High school                                    | 22.4                                                                                                                 | 30.1                                                                                                                         |                                             |
| At least some college                          | 57.2                                                                                                                 | 50.6                                                                                                                         |                                             |
| Medical Insurance                              |                                                                                                                      |                                                                                                                              | <.001                                       |
| Covered by medical Insurance                   | 83.1                                                                                                                 | 73.0                                                                                                                         |                                             |
| Not covered by any medical insurance           | 16.9                                                                                                                 | 27.0                                                                                                                         |                                             |
| Year                                           |                                                                                                                      |                                                                                                                              | <.001                                       |
| 2000                                           | 31.7                                                                                                                 | 34.6                                                                                                                         |                                             |
| 2005                                           | 31.6                                                                                                                 | 33.3                                                                                                                         |                                             |
| 2010                                           | 36.7                                                                                                                 | 32.0                                                                                                                         |                                             |

|                                                                                                 |       |       |       |
|-------------------------------------------------------------------------------------------------|-------|-------|-------|
| <b><i>Smoking Behaviors</i></b>                                                                 |       |       |       |
| Average cigarettes consumed/day (M±SD)                                                          | 15.0  | 14.0  | .002  |
| Daily smokers                                                                                   | 81.4  | 80.4  | ns    |
| Heavy smokers                                                                                   | 12.88 | 10.76 | .005  |
| <b><i>Smoking Cessation</i></b>                                                                 |       |       |       |
| Made quit attempt in past year                                                                  | 48.5  | 43.9  | <.001 |
| Would like to quit cigarettes completely                                                        | 70.8  | 69.3  | .001  |
| Use of cessation aids in last quit attempt among smokers who made any quit attempt in past year |       |       |       |
| Nicotine Replacement Therapy (NRT)                                                              | 27.1  | 20.4  | <.001 |
| Prescription medication                                                                         | 12.1  | 8.1   | <.001 |
| One-on-one counseling                                                                           | 3.5   | 1.3   | <.001 |
| Telephone quit line <sup>b</sup>                                                                | 5.0   | 2.3   | <.001 |
| Clinic, class or support group                                                                  | 2.8   | 1.5   | <.001 |
| Did not use any of the aids above                                                               | 64.7  | 73.5  | <.001 |
| Advised by health professional to quit smoking <sup>c</sup>                                     | 64.5  | 52.7  | <.001 |
| Smoke free home                                                                                 | 40.9  | 45.6  | <.001 |

<sup>a</sup> Means were compared by t tests, and proportions were compared by chi square tests.

<sup>b</sup> 2005 and 2010 sample only

<sup>c</sup> Study sample is current smokers who had seen a health professional in the past year (n=14,316).

**Trends in Smoking Cessation among Current Smokers Seeking Mental Health Treatment during 2000-2010**

|                                                                                                 | 2000 | 2005 | 2010 | Linear Trend <sup>a</sup> |           |         |
|-------------------------------------------------------------------------------------------------|------|------|------|---------------------------|-----------|---------|
|                                                                                                 | %    |      |      | OR                        | 95% CI    | p-value |
| Made quit attempt in past year                                                                  | 49.0 | 49.6 | 47.2 | .96                       | .85-1.08  | ns      |
| Would like to quit cigarettes completely                                                        | 75.1 | 71.4 | 66.5 | .81                       | .69-.94   | .008    |
| Use of cessation aids in last quit attempt among smokers who made any quit attempt in past year |      |      |      |                           |           |         |
| Nicotine Replacement Therapy (NRT)                                                              | 18.4 | 33.7 | 32.2 | 1.43                      | 1.18-1.73 | <.001   |
| Prescription medication                                                                         | 7.4  | 9.2  | 20.6 | 1.85                      | 1.40-2.45 | <.001   |
| One-on-one counseling                                                                           | 1.2  | 5.8  | 4.3  | 1.64                      | 1.16-2.33 | .005    |
| Telephone quit line                                                                             | NA   | 3.6  | 6.2  | 1.78                      | .94-3.38  | ns      |
| Clinic, class or support group                                                                  | 0.8  | 5.0  | 3.3  | 1.64                      | 1.19-2.26 | .002    |
| Did not use any of the aids above                                                               | 74.6 | 59.4 | 56.9 | .67                       | .56-.80   | <.001   |
| Advised by health professional to quit smoking                                                  | 64.6 | 65.9 | 63.1 | .96                       | .81-1.10  | ns      |
| Smoke free home                                                                                 | 28.3 | 44.7 | 49.0 | 1.53                      | 1.34-1.76 | <.001   |

<sup>a</sup> Linear time trend was estimated by bivariate logistic models, with survey years coded into a continuous regressor (year 2000=1, year 2005=2, and year 2010=3). The reported odds ratios indicated the average relative likelihood of having a smoking cessation behavior in a 5-year interval during 2000-2010.
